# Supplementary material
Source: PubMed Central journal article supplement (PMC8233403)
Supplement: NIHMS1657653-supplement-1.pdf [file NIHMS1657653-supplement-1.pdf]

Appendix A

|                                      |                                                 |                                                  |
|--------------------------------------|-------------------------------------------------|--------------------------------------------------|
| <b>TUESDAY NIGHT</b>                 |                                                 |                                                  |
| <b>Routine</b>                       |                                                 | Comments about the ease of bedtime:              |
| Start Time ___ : ___                 |                                                 | _____                                            |
| <input type="checkbox"/> Bath        | <input type="checkbox"/>                        | _____                                            |
| <input type="checkbox"/> P.J.'s      | <input type="checkbox"/> _____                  | _____                                            |
| <input type="checkbox"/> Brush Teeth | <input type="checkbox"/> _____                  | _____                                            |
| <input type="checkbox"/> Prayers     | <input type="checkbox"/> _____                  | _____                                            |
| <input type="checkbox"/> Story       | <input type="checkbox"/> _____                  | _____                                            |
| <b>Nighttime</b>                     |                                                 | Reasons for night waking or difficulty sleeping: |
| Time in Bed ___ : ___                |                                                 | _____                                            |
| Night waking 1: ___ : ___            | Time Back in bed ___ : ___                      | _____                                            |
| Night waking 2: ___ : ___            | Time Back in bed ___ : ___                      | _____                                            |
| Night waking 3: ___ : ___            | Time Back in bed ___ : ___                      | _____                                            |
| <b>WEDNESDAY</b>                     |                                                 |                                                  |
| <b>Morning</b>                       |                                                 | Anything unusual about waking:                   |
| Time Awake ___ : ___                 |                                                 | _____                                            |
| <input type="checkbox"/> Woke Self   | <input type="checkbox"/> Someone Woke Up        | _____                                            |
| Wearing Actigraph                    |                                                 | _____                                            |
| <input type="checkbox"/> Yes         | <input type="checkbox"/> No (Time on ___ : ___) | _____                                            |
| <b>Naps</b>                          |                                                 | Comments on the typicality of today's naps:      |
| Nap 1 Start Time: ___ : ___          | Time Awake ___ : ___                            | _____                                            |
| Nap 2 Start Time: ___ : ___          | Time Awake ___ : ___                            | _____                                            |
| <b>Daytime</b>                       |                                                 | Reasons for taking Actigraph off:                |
| Time Taken Off ___ : ___             | Time On ___ : ___                               | _____                                            |
| Time Taken Off ___ : ___             | Time On ___ : ___                               | _____                                            |
| Time Taken Off ___ : ___             | Time On ___ : ___                               | _____                                            |

Supplementary Figure 1A. Sample child sleep diary that has been customized based on the parent report of the child's routine
